# Supplementary material for: Self-Assemblies of Single-Walled Carbon Nanotubes through Tunable Tethering of Pyrenes by Dextrin for Rapidly Chiral Sensing
Source: Hindawi journal article supplement (doi:10.1155/2011/862692), 2011-01-01
Supplement: f1 [file 862692.f1.doc]

**Supporting Information for:**

**Self-Assemblies of Single-Walled Carbon Nanotubes through Tunable Tethering of Pyrenes by Dextrin for Rapidly Chiral Sensing**

*Wei-Li Wei, Qiushui Chen, Haifang Li, and Jin-Ming Lin**

Beijing Key Laboratory for Analytical Methods and Instrumentation, Department of Chemistry, Tsinghua University, Beijing 100084, China

**Contents:** Figure S1. UV/Vis spectra of Py-Dex,Py-Amy, and 1-aminopyrene; Figure S2. Fluorescence emission spectra ofPy-Dex, Py-Amy, and 1-aminopyrene; Figure S3. 1H NMR spectrum (600 MHz, in DMSO-D6) of Py-Dex; Figure S4. MALDI-TOF MS spectrum of Py-Dex; Figure S5. Q-TOF MS of the enzymatic solution of Py-Amy**.** Scheme S1. Enzymatic method for the characterization of Py-Am**y**.

20

0

25

0

30

0

35

0

40

0

45

0

0

.

0

0

.

2

0

.

4

0

.

6

0

.

8

353

n

m

281

n

m

242

n

m

A

b

s

.

W

a

v

e

l

e

n

g

t

h

(

n

m

)

2

.

2

m

g

/

m

L

Py-Amy

0

.

65

m

g

/

m

L

Py-Dex

59



M

1

-

aminopyrene

Figure S1. UV/Vis spectra of Py-Dex,Py-Amy, and 1-aminopyrene.

35

0

40

0

45

0

50

0

55

0

0

10

0

20

0

30

0

40

0

50

0

60

0

F

l

u

o

r

e

s

c

e

n

t

I

n

t

e

n

s

i

t

y

W

a

v

e

l

e

n

g

t

h

(

n

m

)

0

.

13



M

1

-

aminopyrene

13

.

3



g

/mL

Py-Amy

1

.

33



g

/mL

Py-Dex

E

x

c

i

t

e

d

a

t

360

n

m

438

n

m

441

n

m

441

n

m

Figure S2. Fluorescence emission spectra ofPy-Dex, Py-Amy, and 1-aminopyrene.


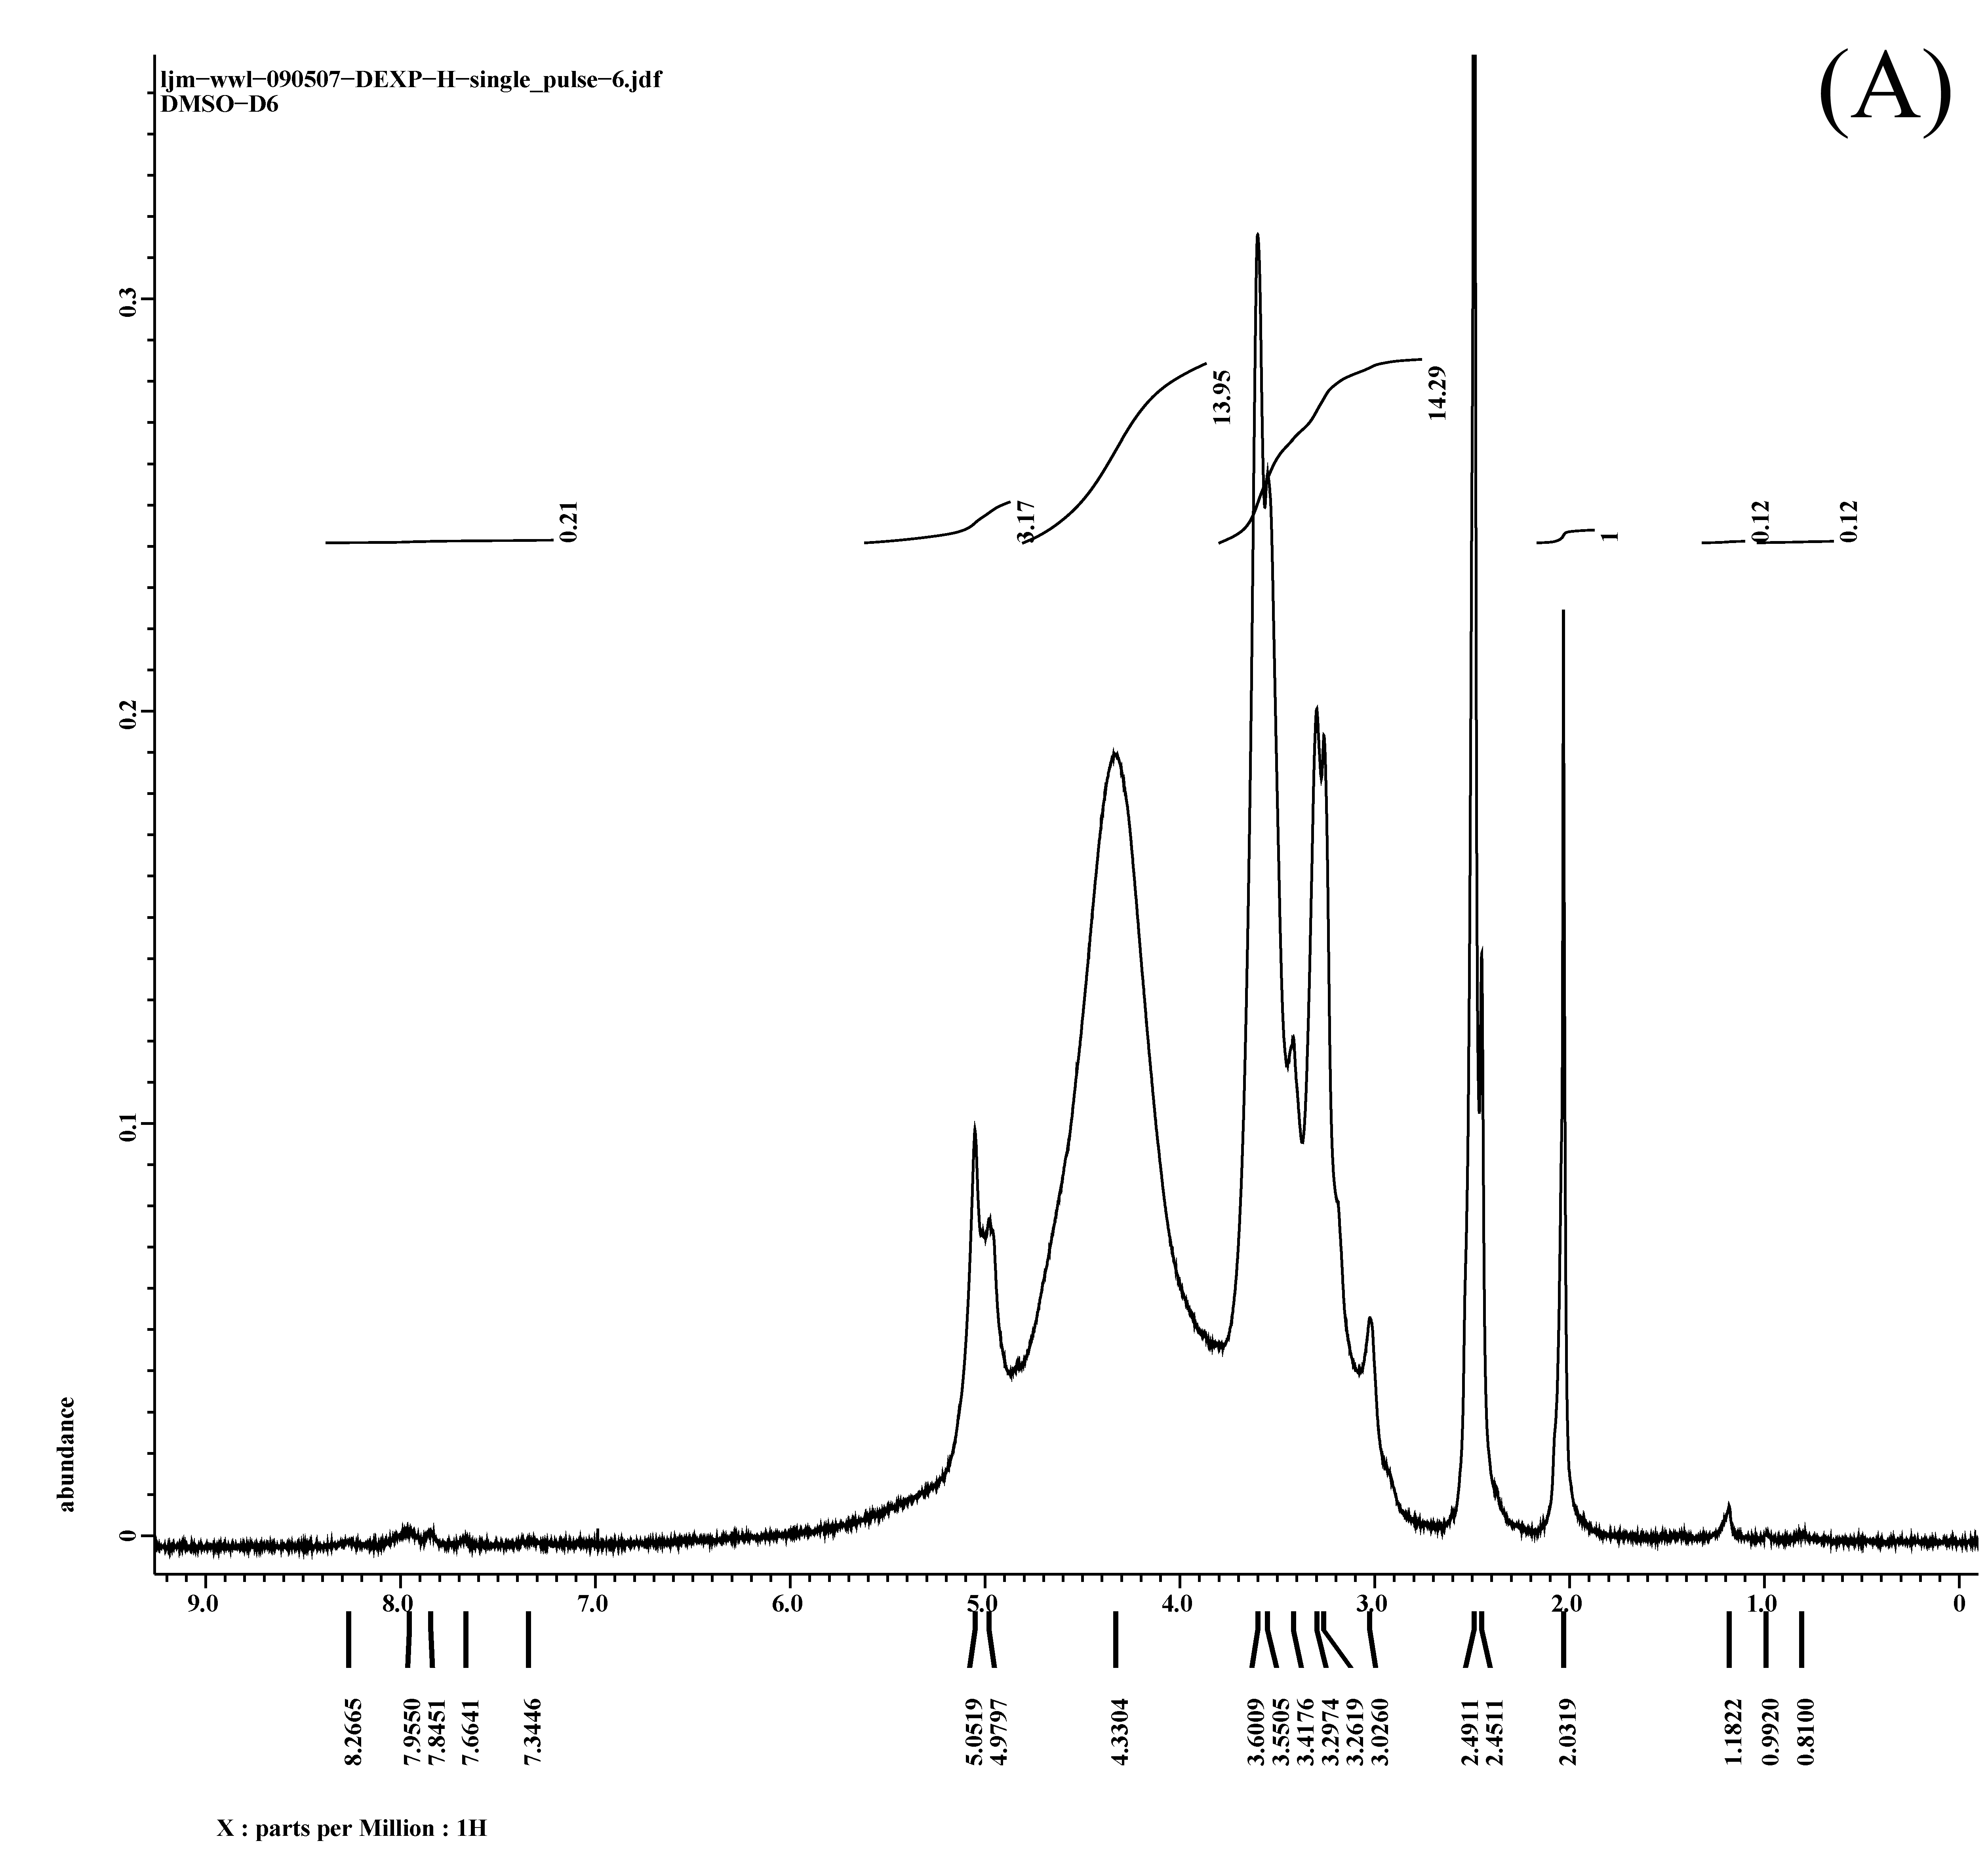


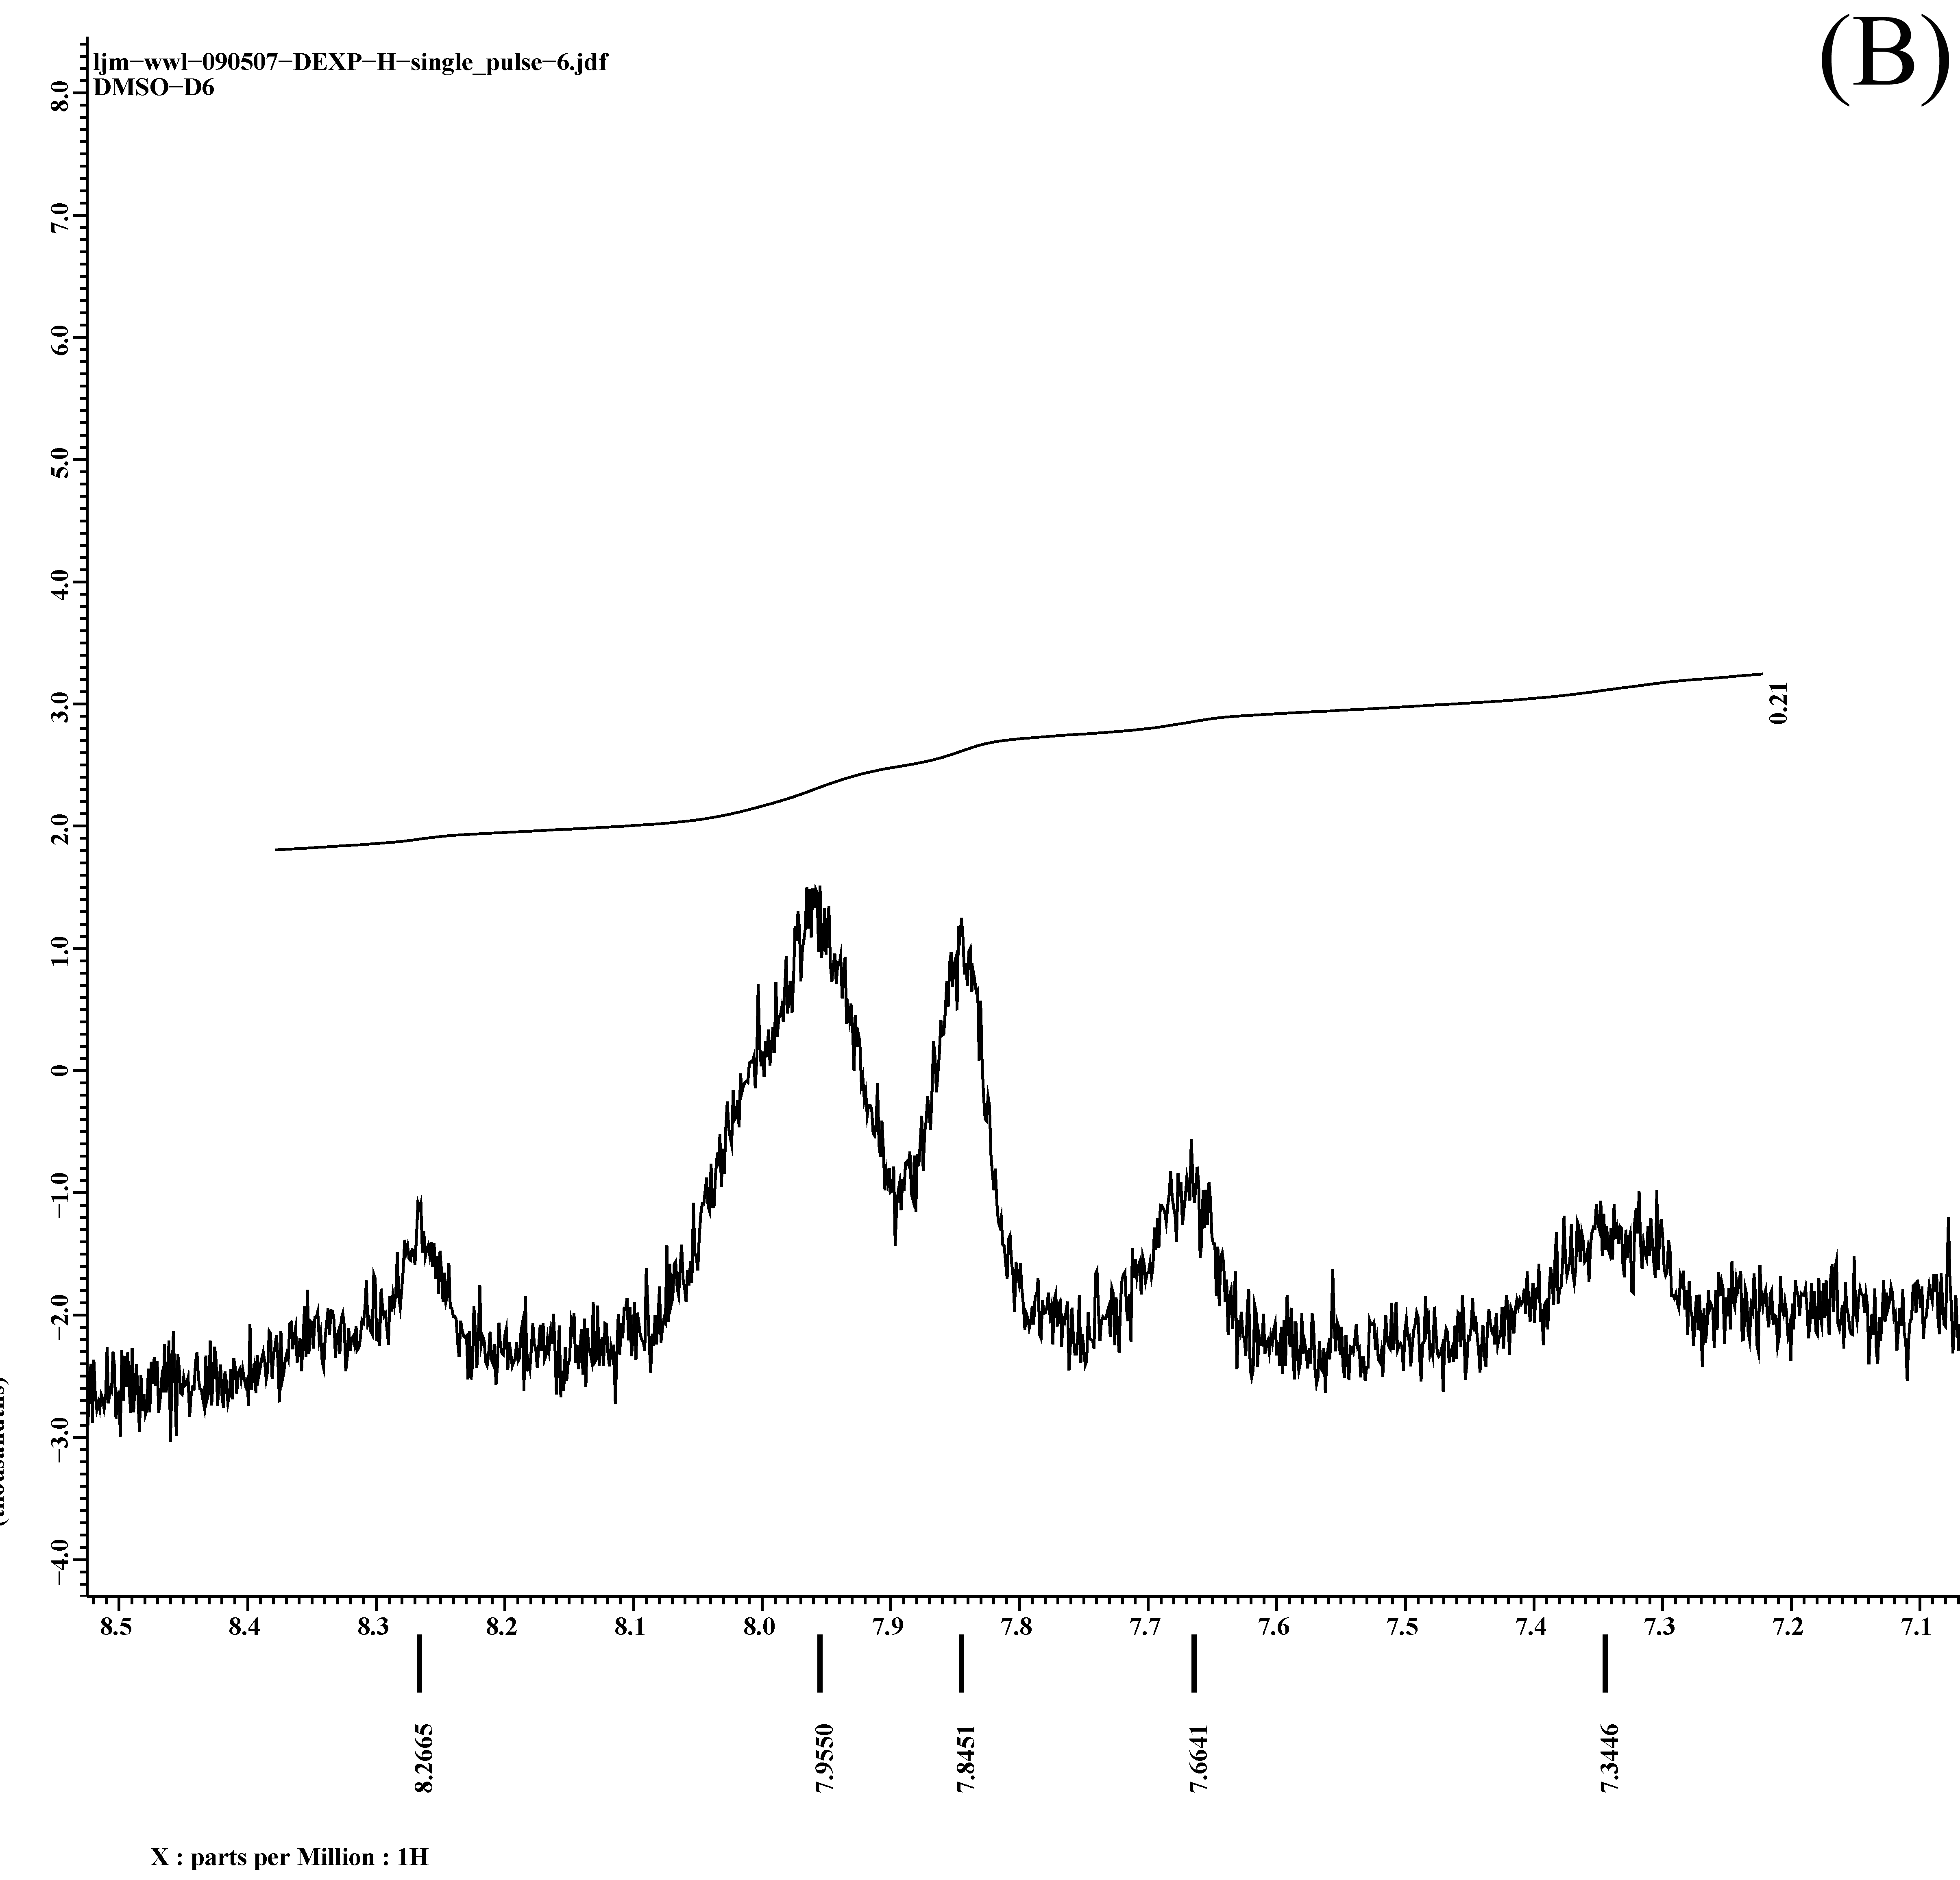


Figure S3. 1H NMR spectrum (600 MHz, in DMSO-D6) of Py-Dex**.**


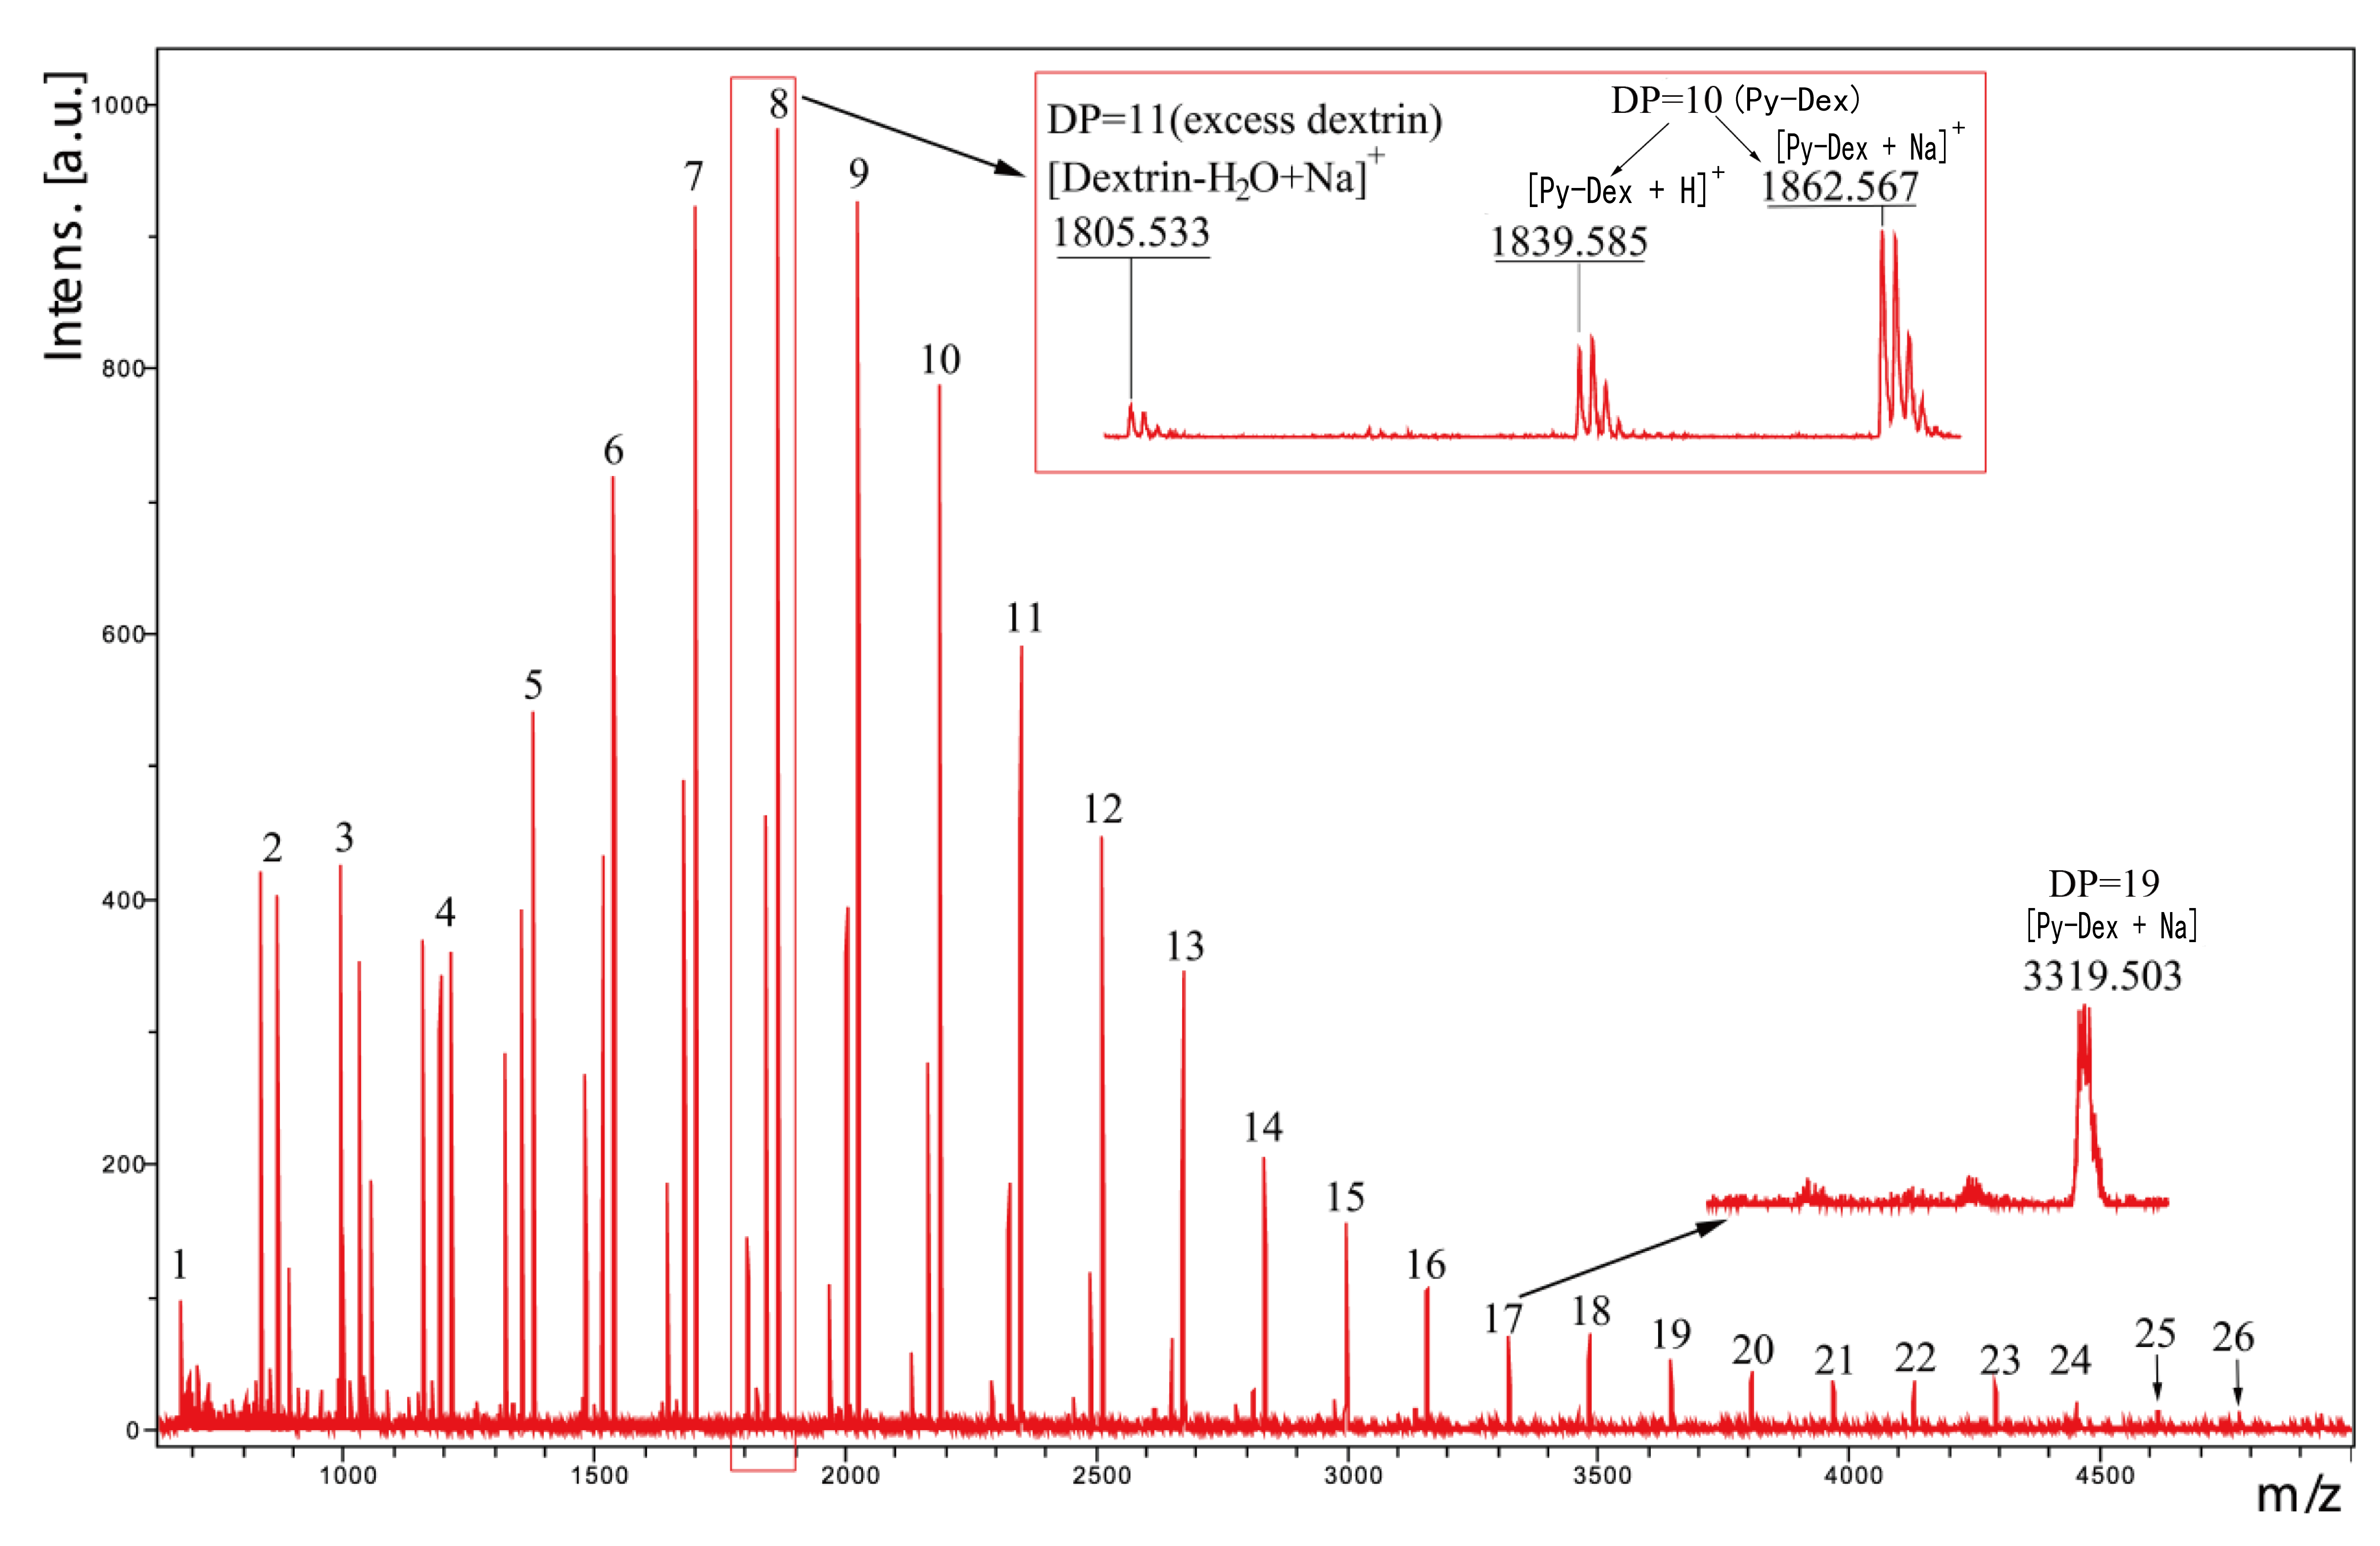


Figure S4. MALDI-TOF MS spectrum of Py-Dex. DP represents degree of polymerization of dextrin moieties. Peak 1 is the excess dextrin of DP 4. Peaks from 2 to 26 represent the components of Py-Dex with DP from 4 to 28, respectively.


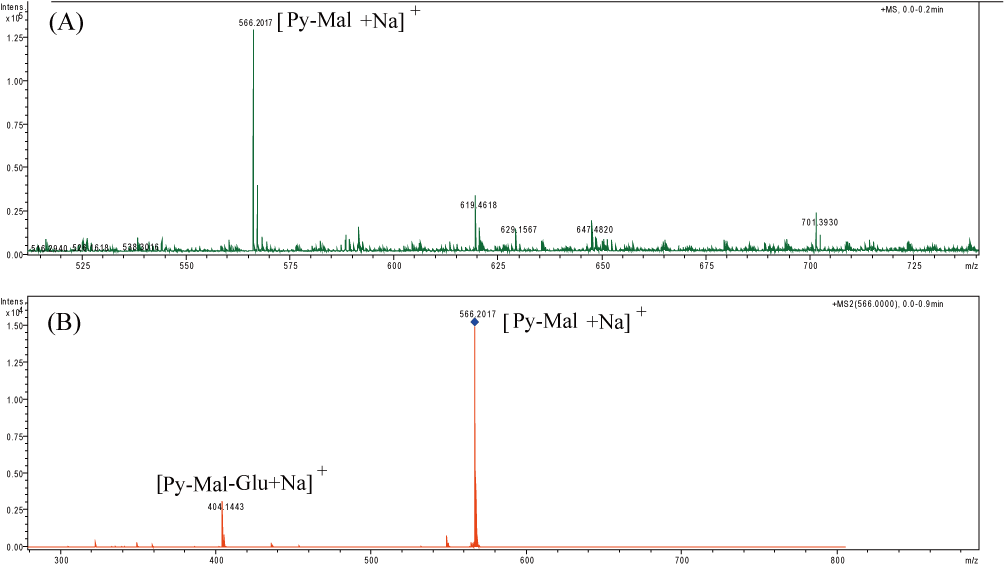


Figure S5. Q-TOF MS of the enzymatic solution of Py-Dex**.** Py-Mal was founded in the enzymatic solution of Py-Amy. Glu represents glucose unit (C6H10O5).

Scheme S1. Enzymatic method for the characterization of Py-Amy.
